# Supplementary material for: High-performance gas sensors based on single-wall carbon nanotube random networks for the detection of nitric oxide down to the ppb-level
Source: Royal Society of Chemistry journal article supplement (doi:10.1039/c8nr07393g), 2018-11-23
Supplement: c8nr07393g1.pdf [file c8nr07393g1.pdf]

## Electronic Supplementary Information

# High-performance gas sensors based on functionalized single-wall carbon nanotube random networks for detection of nitric oxide down to ppb-level

Jun-Young Jeon<sup>1,2†</sup>, Byeong-Cheol Kang<sup>1†</sup>, Young Tae Byun<sup>2\*</sup>, and Tae-Jun Ha<sup>1\*</sup>

<sup>1</sup> *Department of Electronic Materials Engineering, Kwangwoon University Seoul 139-701,  
Republic of Korea*

<sup>2</sup> *Sensor System Research Center, Korea Institute of Science and Technology (KIST) Seoul 136-  
791, Korea*

\*Corresponding author. Tel.: +82 2 940 8678.

*E-mail address:* [taejunha0604@gmail.com](mailto:taejunha0604@gmail.com), [byt427@kist.re.kr](mailto:byt427@kist.re.kr)

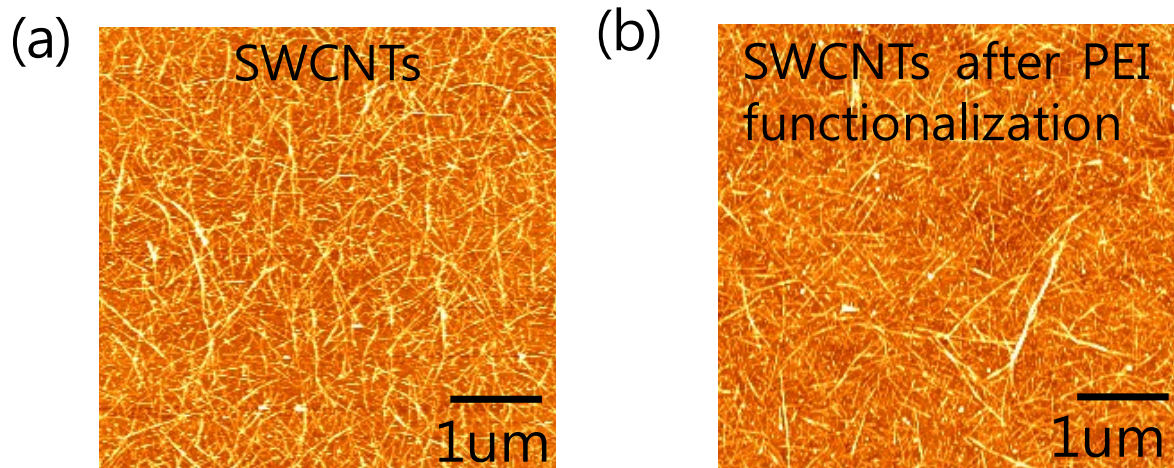

**Figure S1.** Morphology of SWCNT random networks (a) before and (b) after functionalization with PEI (concentration of 10 wt%), obtained by AFM measurements

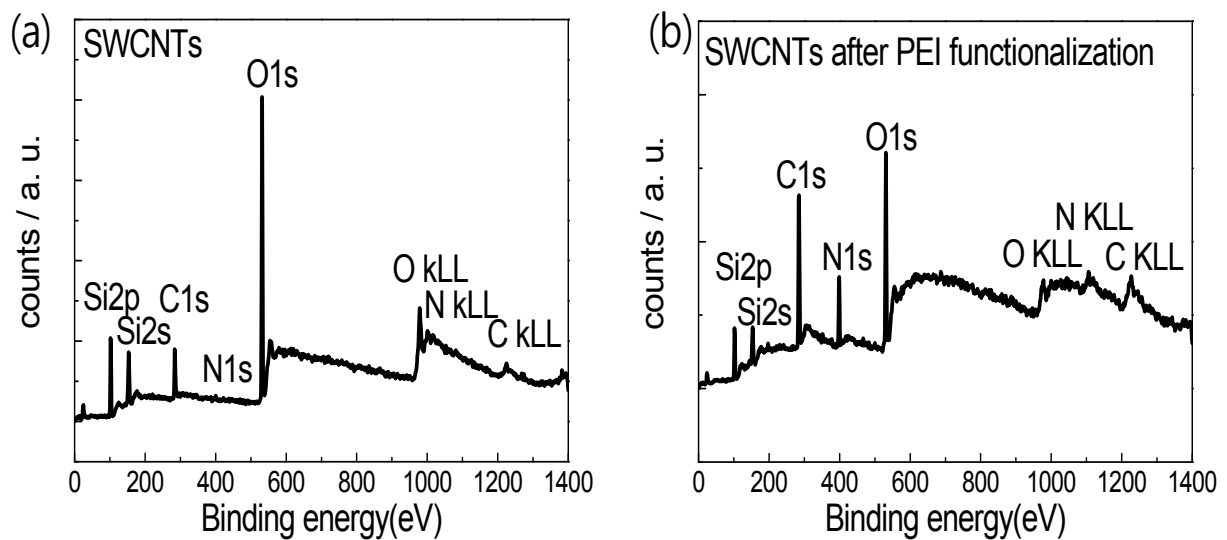

**Figure S2.** XPS spectra of elements of C, N, and O in the chemical bonding of the SWCNT random networks (a) before and (b) after functionalization with PEI (concentration of 10 wt%)

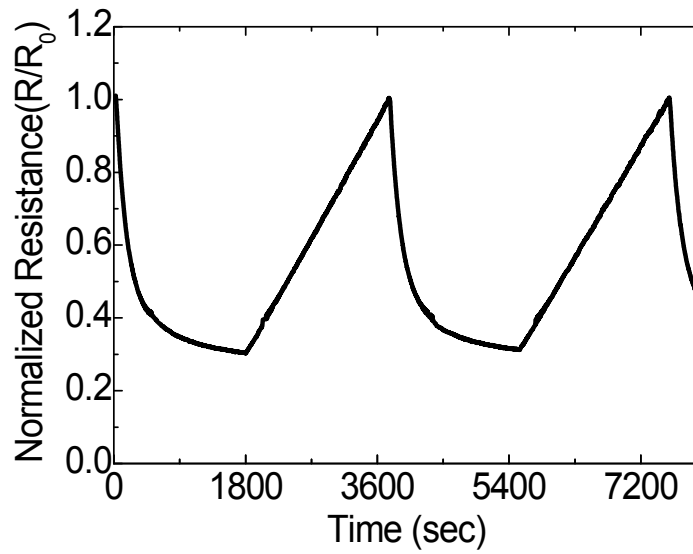

**Figure S3.** The normalized response of SWCNT random networks after functionalization with PEI as the recovery time was increased and almost 100% of resistance was recovered to the initial

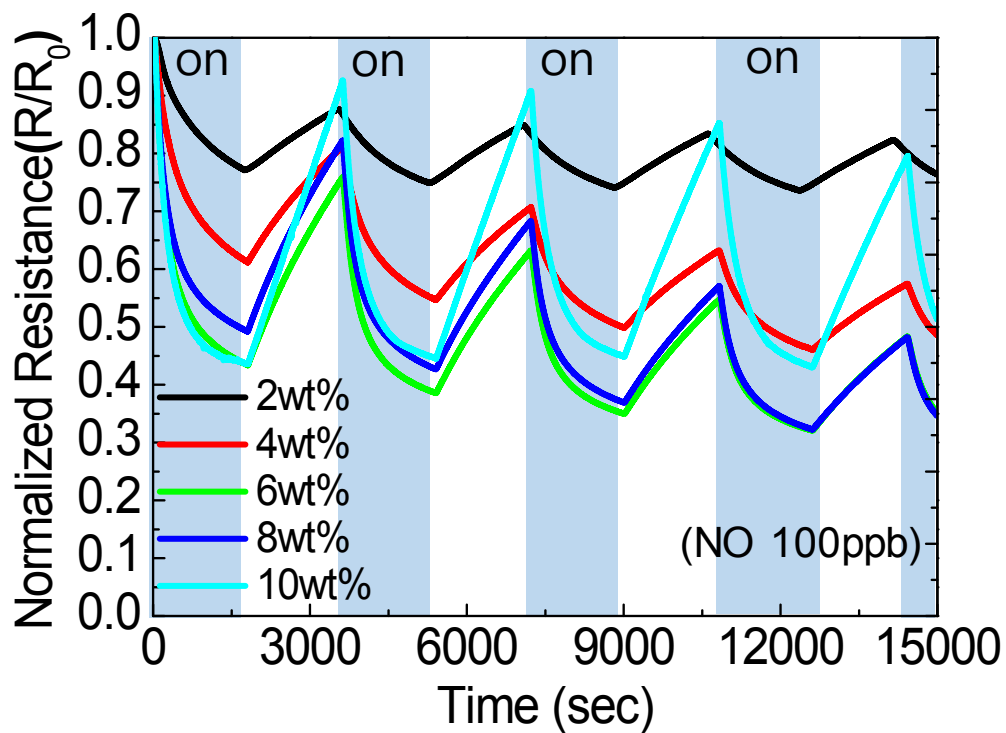

**Figure S4.** The normalized resistance of the proposed NO gas sensors with different PEI concentrations (0, 2, 4, 6, 8, and 10 wt%)

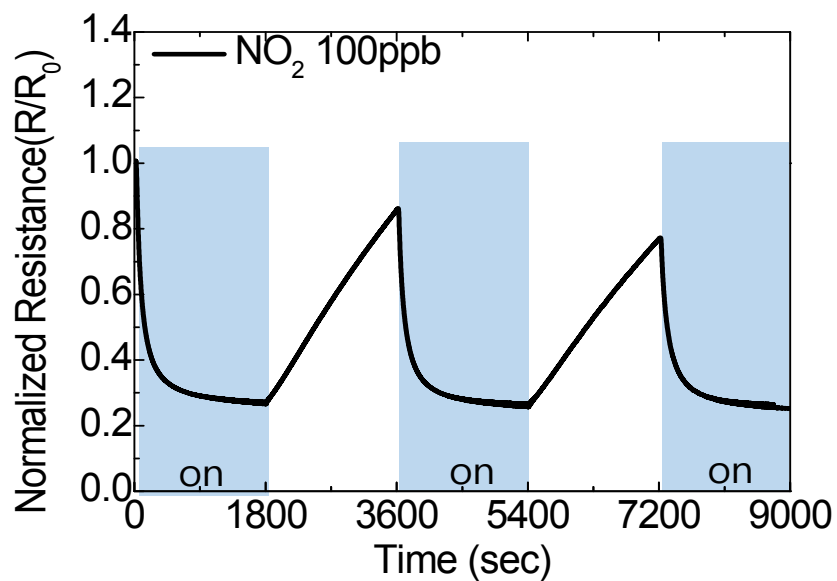

**Figure S5.** The normalized resistance of SWCNT random networks after functionalization with PEI when exposed to the NO<sub>2</sub> gas at 100 ppb

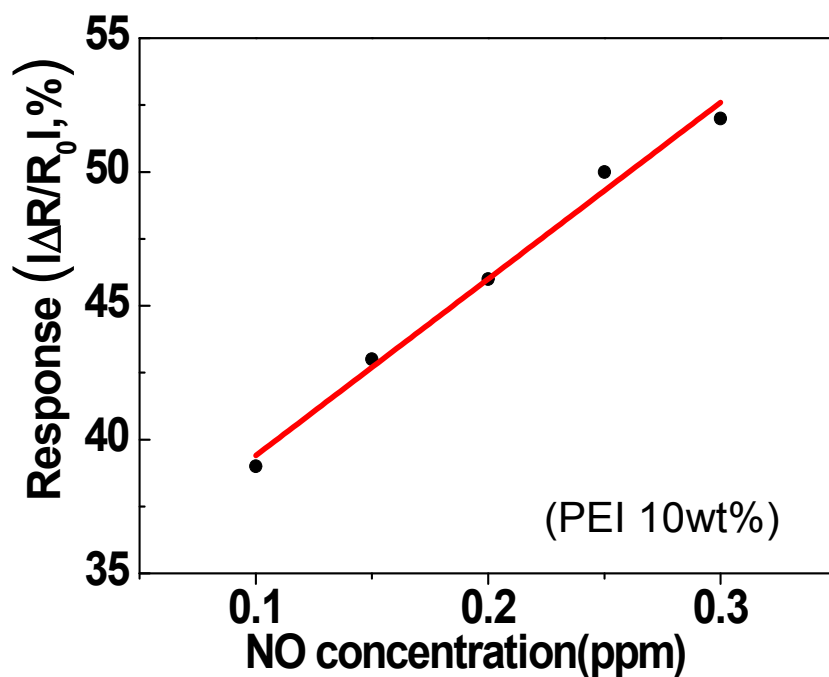

**Figure S6.** The theoretical detection limit of the proposed NO gas sensors by linear extrapolation from the response slope in the linear regime at low ppb level

**Table S1.** 5<sup>th</sup> order polynomial fitting implemented within data-point range

| *Time (sec) | $(Y_i - Y)$ | $(Y_i - Y)^2$         |
|-------------|-------------|-----------------------|
| 200         | 0.00130     | $1.70 \times 10^{-6}$ |
| 210         | -0.00418    | $1.74 \times 10^{-5}$ |
| 220         | 0.00331     | $1.09 \times 10^{-5}$ |
| 230         | 0.00199     | $3.97 \times 10^{-6}$ |
| 240         | -0.00113    | $1.28 \times 10^{-6}$ |
| 250         | -0.00462    | $2.13 \times 10^{-5}$ |
| 260         | 0.00224     | $5.02 \times 10^{-6}$ |
| 270         | 0.00298     | $8.88 \times 10^{-6}$ |
| 280         | -0.00144    | $2.09 \times 10^{-6}$ |
| 290         | -0.000904   | $8.18 \times 10^{-7}$ |
| 300         | -0.000462   | $2.14 \times 10^{-7}$ |

\* The time when the resistance is measured.

1. We carried out the linear fitting on the sensitivity of the proposed NO gas sensors as a function of NO concentration, as shown in Fig. S4,
2. We extracted the measured values of electrical resistance in the proposed NO gas sensors (from 11 points).
3. We conducted a 5th order polynomial fitting implemented within data-point range (see Table S1) where  $Y_i$  is the measured data point and  $Y$  is the corresponding value calculated from the curve-fitting equation

$$V_{x^2} = \sum (Y_i - Y)^2$$

4. We calculated the RMSnoise from the following equation

$$RMS_{noise}(ppm^{-1}) = \sqrt{V_{x^2} / (N - 1)}$$

where N is the number of data points used in the curve fitting

5. We extracted the detection limit by using the following equation.

$$\text{Detection limit} = 3 \times \frac{RMS_{noise}}{\text{slope}}$$

**Table S2.** Sensing performance of NO gas sensors in previous studies based on various materials, such as metal oxide, polymer, or carbon-based material

| material                                                                                             | Response (%) | NO concentration (ppm) | Response time (min) | Reference |
|------------------------------------------------------------------------------------------------------|--------------|------------------------|---------------------|-----------|
| zinc oxide                                                                                           | 7.3          | 10                     | 5                   | 1         |
| Nickel phthalocyanine                                                                                | 0.4          | 5                      | 20                  | 2         |
| WO <sub>3</sub> /Cr <sub>2</sub> O <sub>3</sub>                                                      | 10           | 5                      | 60                  | 3         |
| poly[N-9'-heptadecanyl-2,7-carbazole-alt-5,5-(4',7'-di-2-thienyl-2',1',3'-benzothiadiazole)](PCDTBT) | 5            | 5                      | 5                   | 4         |
| Multi wall carbon nanotube                                                                           | 1            | 2                      | 30                  | 5         |
| Single wall carbon nanotube                                                                          | 12           | 1                      | 10                  | 6         |
| Tin dioxide (SnO <sub>2</sub> )                                                                      | 28.7         | 1                      | 6                   | 7         |
| PEDOT:PSS                                                                                            | 2.2          | 0.35                   | 10                  | 8         |
| zinc oxide                                                                                           | 8.25         | 0.25                   | 15                  | 9         |
| indium gallium zinc oxide                                                                            | 0.02         | 0.1                    | 2                   | 10        |
| Single wall carbon nanotube                                                                          | 9            | 0.005                  | 1                   | 11        |
| Single wall carbon nanotube                                                                          | 50           | 0.1                    | 30                  | Thiswork  |

## References

1. C.-C. Liu, J.-H. Li, C.-C. Chang, Y.-C. Chao, H.-F. Meng, S.-F. Horng, C.-H. Hung and T.-C. Meng, *J. Phys. D: Appl. Phys.*, 2009, **42**, 155105.
2. K.-C. Ho and Y.-H. Tsou, *Sensor. Actuat. B-Chem.*, 2001, **77**, 253-259.
3. C. Sun, G. Maduraiveeran and P. Dutta, *Sensor. Actuat. B-Chem.*, 2013, **186**, 117-125.
4. A. Gusain, N. J. Joshi, P. Varde and D. Aswal, *Sensor. Actuat. B-Chem.*, 2017, **239**, 734-745.
5. T. Ueda, S. Katsuki, N. H. Abhari, T. Ikegami, F. Mitsugi and T. Nakamiya, *Surf. Coat. Tech*, 2008, **202**, 5325-5328.
6. J. Mäklin, T. Mustonen, K. Kordás, S. Saukko, G. Tóth and J. Vähäkangas, *phys. status solidi B*, 2007, **244**, 4298-4302.
7. C.-Y. Kim, H. Jung, H. Choi and D.-k. Choi, *J. Korean Phys. Soc.*, 2016, **68**, 357-362.
8. C.-Y. Lin, J.-G. Chen, C.-W. Hu, J. J. Tunney and K.-C. Ho, *Sensor. Actuat. B-Chem.*, 2009, **140**, 402-406.
9. C.-Y. Lin, J.-G. Chen, W.-Y. Feng, C.-W. Lin, J.-W. Huang, J. J. Tunney and K.-C. Ho, *Sensor. Actuat. B-Chem.*, 2011, **157**, 361-367.
10. H.-W. Zan, C.-H. Li, C.-C. Yeh, M.-Z. Dai, H.-F. Meng and C.-C. Tsai, *Appl. Phys. Lett.*, 2011, **98**, 253503
11. O. Kuzmych, B. L. Allen and A. Star, *Nanotechnology*, 2007, **18**, 375502.
